# Supplementary material
Source: PubMed Central journal article supplement (PMC6644272)
Supplement: ao7b00322_si_001.pdf [file ao7b00322_si_001.pdf]

# Supporting Information

## Thixotropic peptide-based physical hydrogels applied to three-dimensional cell culture

Nicola Zanna,<sup>a</sup> Stefano Focaroli,<sup>b</sup> Andrea Merlettini,<sup>a</sup> Luca Gentilucci,<sup>a</sup> Gabriella Teti,<sup>b</sup> Mirella Falconi,<sup>b</sup> and Claudia Tomasini<sup>a\*</sup>

<sup>a</sup> Dipartimento di Chimica “Giacomo Ciamician” - Alma Mater Studiorum Università di Bologna - Via F. Selmi 2, 40126 Bologna (Italy)

<sup>b</sup> Dipartimento di Scienze Biomediche e Neuromotorie – Alma Mater Studiorum Università di Bologna – Via Ugo Foscolo, 7 – 40123 Bologna - Italy

### Contents

|                                                                                                                                                                                 |         |
|---------------------------------------------------------------------------------------------------------------------------------------------------------------------------------|---------|
| <b>Table S1.</b> Physical properties of hydrogels obtained with the gelators <b>A, B</b> and <b>C</b> and a stoichiometric amount of CaCl <sub>2</sub> .                        | Page S2 |
| <b>Figure S1.</b> Photographs of samples of hydrogels prepared with gelators <b>A, B</b> and <b>C</b> and CaCl <sub>2</sub> in different concentration.                         | Page S3 |
| <b>Figure S2.</b> Strain dependence (A-C-E) and frequency dependence (B-D-F) of storage modulus (square) and loss modulus (triangle) for hydrogels <b>8, 10</b> and <b>12</b> . | Page S4 |

**Table S1.** Physical properties of hydrogels obtained with the gelators **A**, **B** and **C** and a stoichiometric amount of  $\text{CaCl}_2$ .

| Gelator (% w/w) | Hydrogel | NaOH (equiv.) | $\text{CaCl}_2$ (equiv.) | $T_{\text{gel}}$ ( $^{\circ}\text{C}$ ) |
|-----------------|----------|---------------|--------------------------|-----------------------------------------|
| <b>A</b> (1)    | <b>1</b> | 2             | 1                        | partial gel                             |
| <b>A</b> (2)    | <b>2</b> | 2             | 1                        | 40 <sup>a</sup>                         |
| <b>B</b> (1)    | <b>3</b> | 1             | 0.5                      | 55 <sup>a</sup>                         |
| <b>B</b> (2)    | <b>4</b> | 2             | 0.5                      | 65 <sup>a</sup>                         |
| <b>C</b> (1)    | <b>5</b> | 1             | 0.5                      | partial gel                             |
| <b>C</b> (2)    | <b>6</b> | 2             | 0.5                      | 30 <sup>a</sup>                         |

<sup>a</sup> Syneresis occurs on heating.

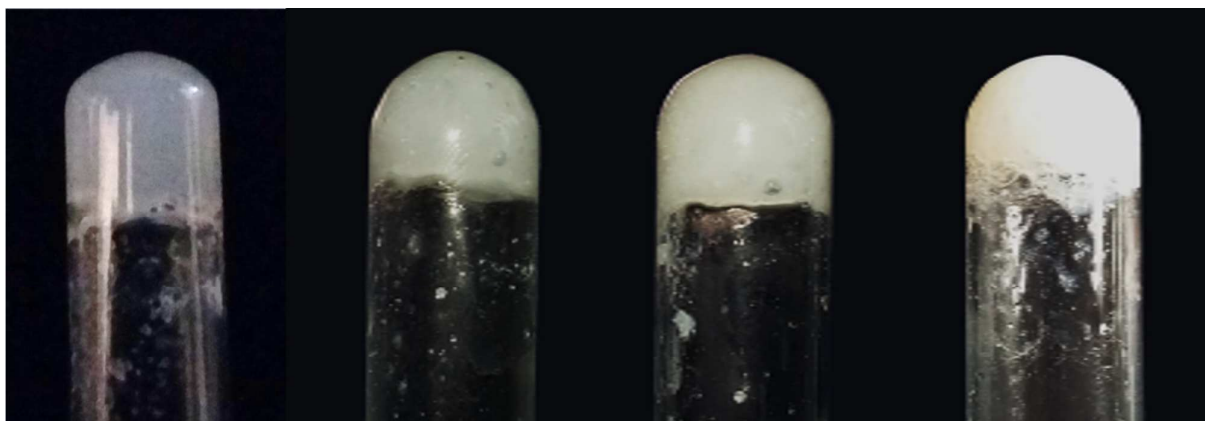

**Figure S1.** Photographs of samples of hydrogels **2**, **3**, **4** and **6** prepared with gelators **A**, **B** and **C** and of hydrogels obtained with the gelators **A-C** and a stoichiometric amount of  $\text{CaCl}_2$ . Hydrogels **1** and **5** were not included because they are partial gels (see Table S1 for details).

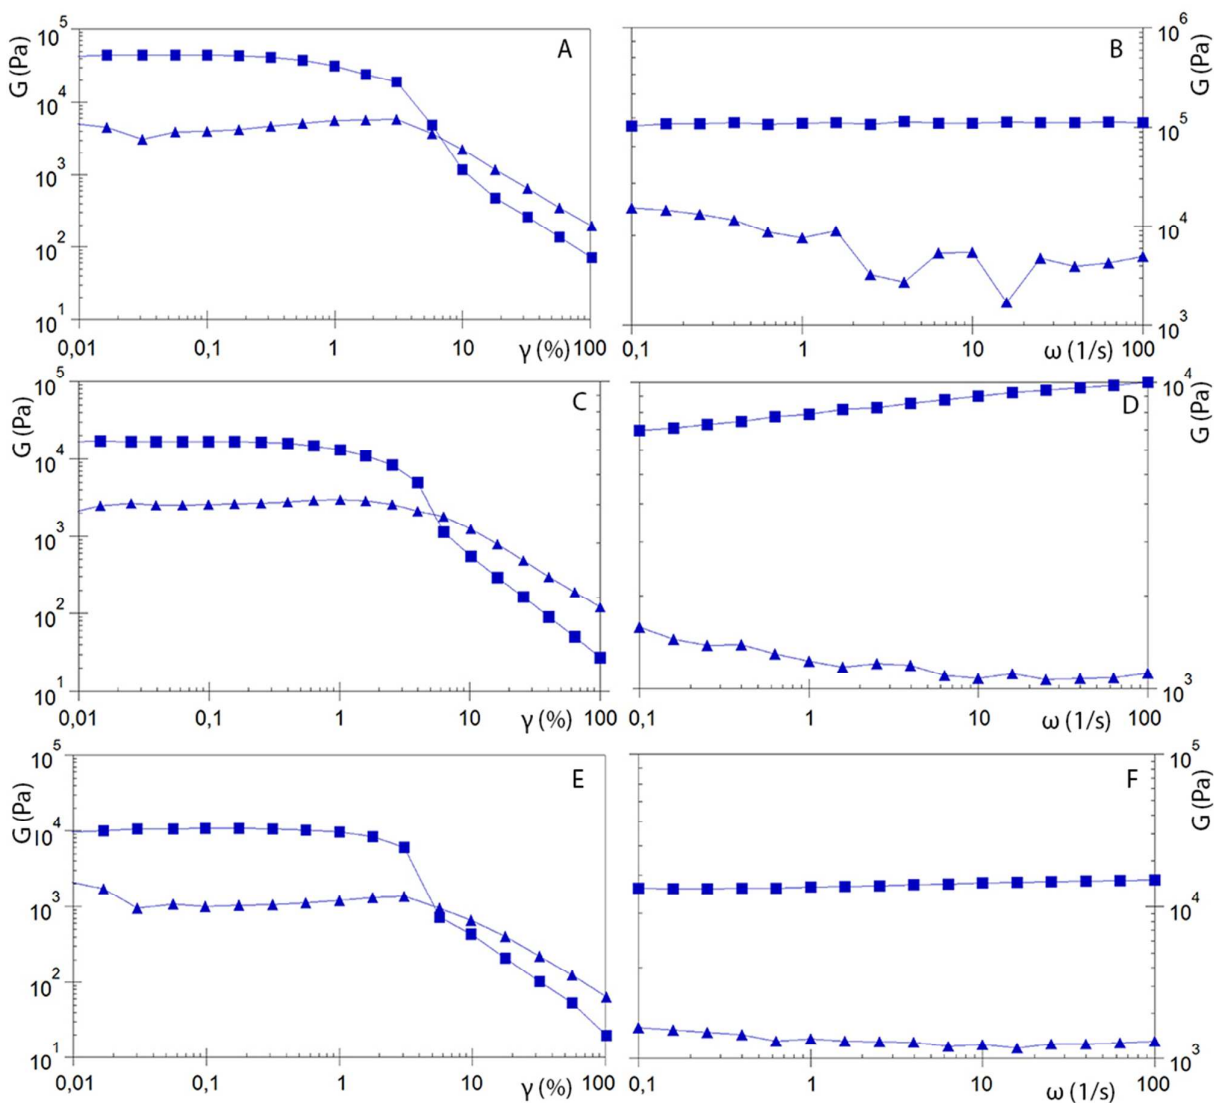

**Figure S2.** Strain dependence (A-C-E) and frequency dependence (B-D-F) of storage modulus (square) and loss modulus (triangle) for hydrogels **8** (A-B), **10** (C-D) and **12** (E-F). The analyses were performed on the hydrogel about 20 hours after the gelation begun.
